# Supplementary material
Source: HighWire-hosted journal article supplement (https://jnm.snmjournals.org/highwire/filestream/94895/field_highwire_adjunct_files/0/175596_Supplemental_Data.pdf)
Supplement: 175596_Supplemental_Data.pdf [file 175596_Supplemental_Data.pdf]

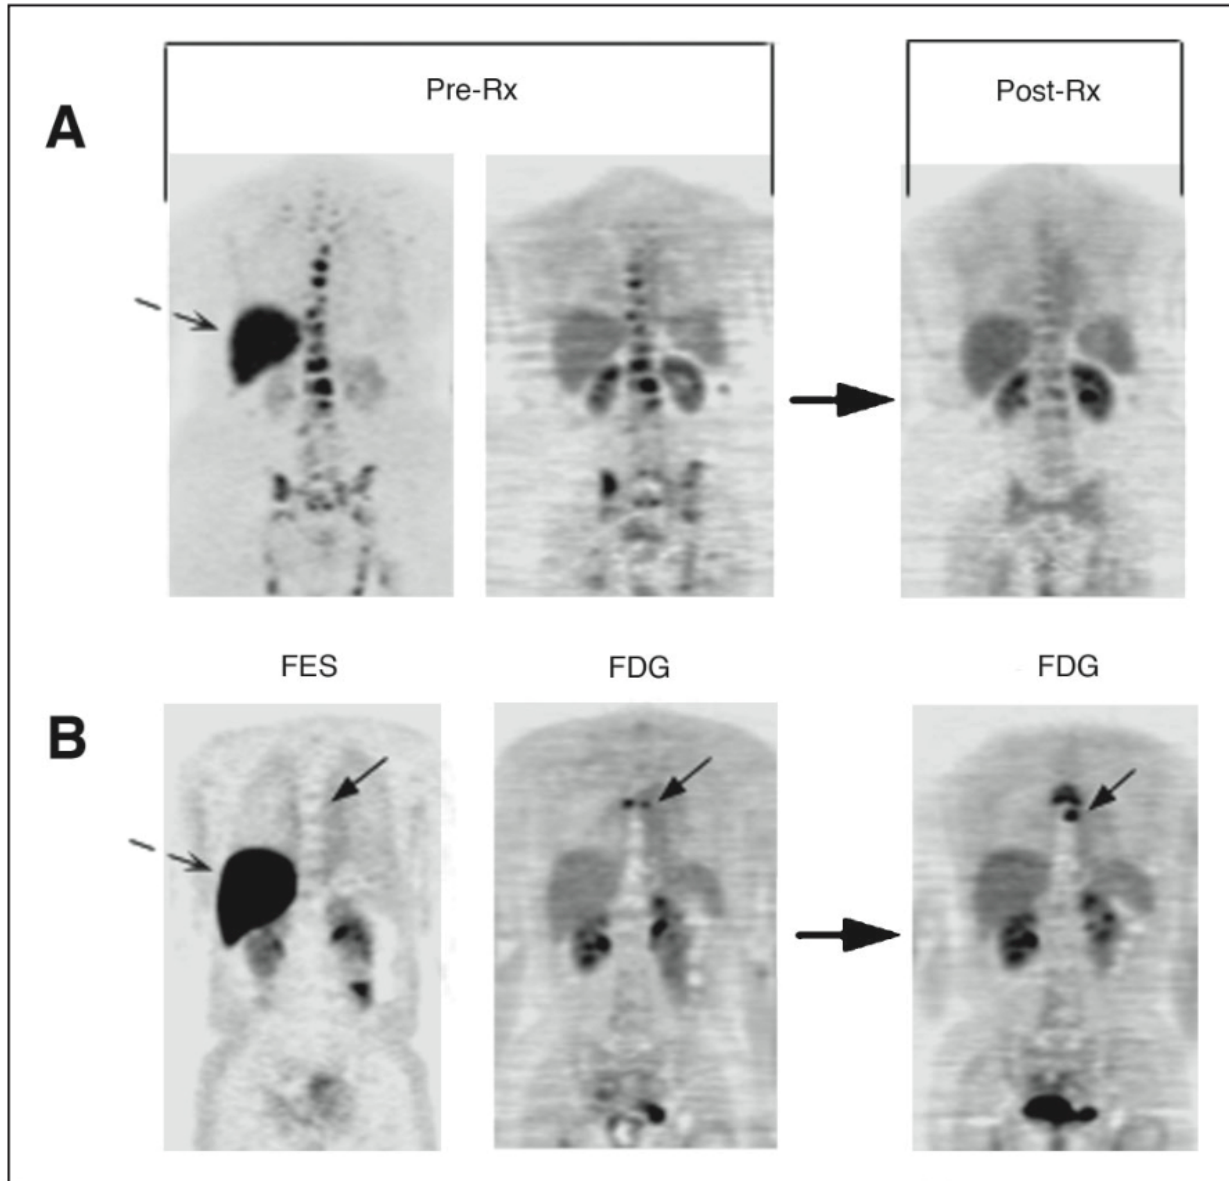

**FIGURE 1. Imaging examples from two patients of baseline  $^{18}\text{F}$ -FES PET and  $^{18}\text{F}$ -FDG PET and follow-up posttherapy  $^{18}\text{F}$ -FDG PET.**

Dashed arrows point out normal liver  $^{18}\text{F}$ -FES uptake. **(A)** Pretreatment  $^{18}\text{F}$ -FES PET and  $^{18}\text{F}$ -FDG PET scans both demonstrate uptake in numerous osseous metastases, with response seen in posttherapy  $^{18}\text{F}$ -FDG PET scan. **(B)** Pretreatment  $^{18}\text{F}$ -FES PET scan does not demonstrate  $^{18}\text{F}$ -FES uptake in osseous metastases seen on pretreatment  $^{18}\text{F}$ -FDG PET scan (solid arrow). Progressive disease is seen on posttherapy  $^{18}\text{F}$ -FDG PET scan. (Reprinted with permission of (25).)

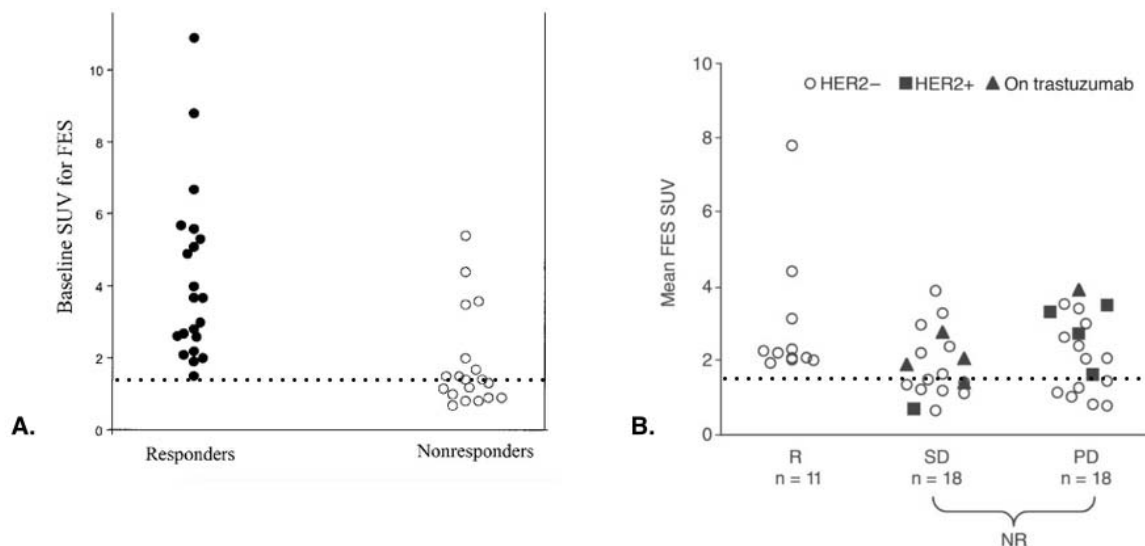

**FIGURE 2. Baseline tumor  $^{18}\text{F}$ -FES uptake for treatment responders and nonresponders.** (A) Baseline  $^{18}\text{F}$ -FES SUV shown for responders vs. nonresponders to tamoxifen. No responders demonstrated SUV < 1.5. (Reprinted with permission of (24).) (B) Baseline mean  $^{18}\text{F}$ -FES SUV is shown for responders (R) and nonresponders (NR) to salvage endocrine treatment. No responders demonstrated SUV < 1.5. SD = stable disease, PD = progressive disease. (Reprinted with permission of (25).)

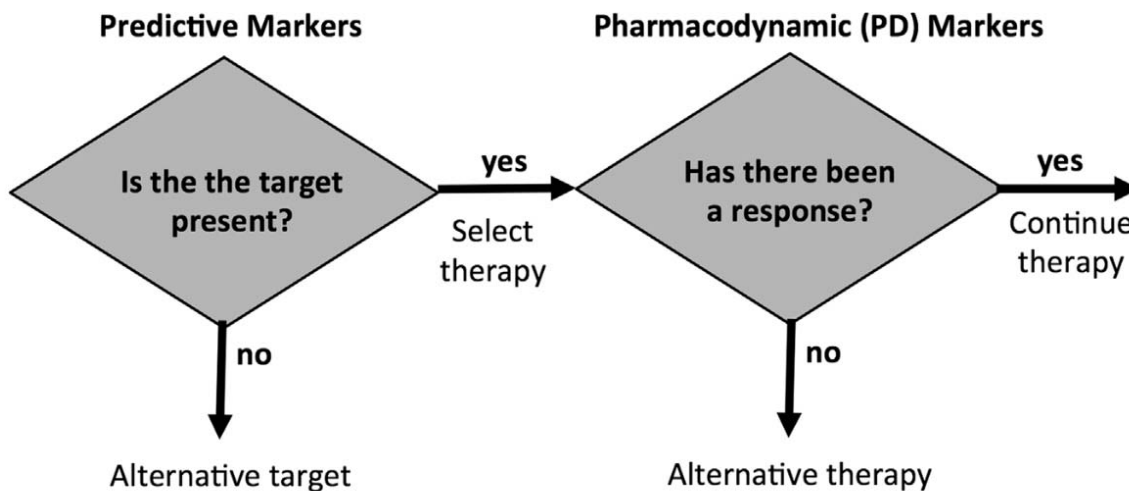

**FIGURE 3. Flowchart diagram illustrating potential roles for molecular imaging companion diagnostics.** Baseline  $^{18}\text{F}$ -FES PET would first establish presence of ER at the tumor site, followed by repeat  $^{18}\text{F}$ -FDG PET after initiation of therapy to assess pharmacodynamic response. (Reprinted with permission of (32).)

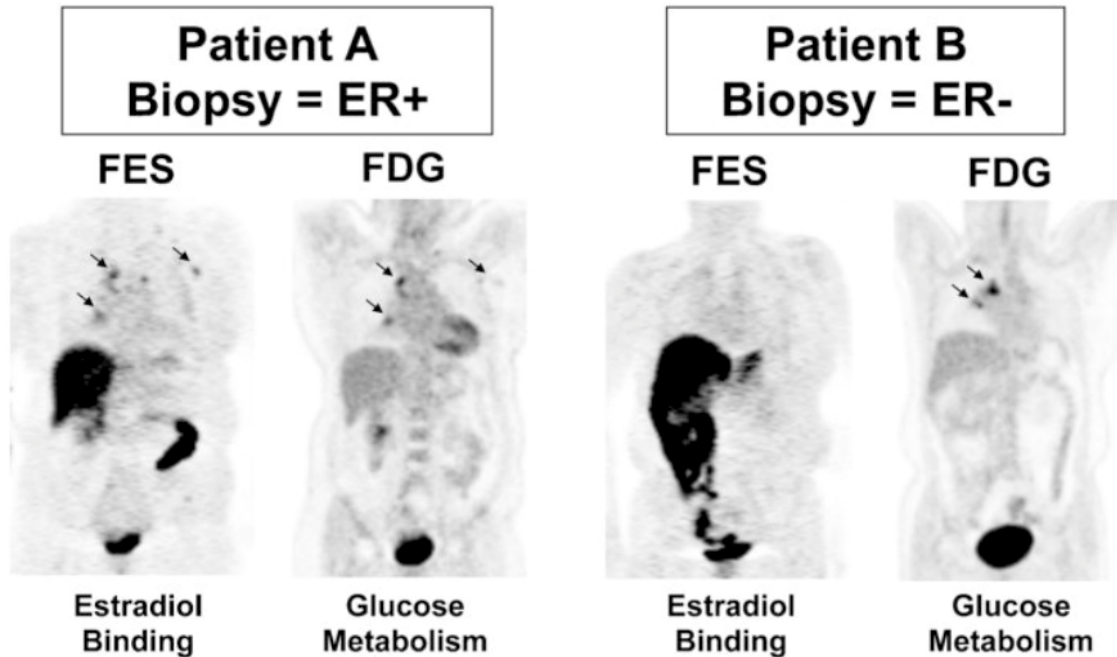

**FIGURE 4. Imaging examples of two patients who underwent pretreatment  $^{18}\text{F}$ -FES PET and  $^{18}\text{F}$ -FDG PET imaging.**

*Left panel:* Patient A had axillary and mediastinal lesions (arrows) seen on both  $^{18}\text{F}$ -FES PET and  $^{18}\text{F}$ -FDG PET scans. Core biopsy of the axillary lesion was ER-positive by immunohistochemistry. *Right panel:* Patient B had mediastinal lesions (arrows) seen only on the  $^{18}\text{F}$ -FDG PET scan. Needle biopsy of a vertebral lesion was ER-negative by immunohistochemistry. (Reprinted with permission of (16).)

**TABLE 1. Clinical <sup>18</sup>F-FES PET studies related to breast cancer**

|                             | # of pts | Study Purpose                                                                                                                                                                                           | Summary of Findings                                                                                                                                                                                                                                                                                                |
|-----------------------------|----------|---------------------------------------------------------------------------------------------------------------------------------------------------------------------------------------------------------|--------------------------------------------------------------------------------------------------------------------------------------------------------------------------------------------------------------------------------------------------------------------------------------------------------------------|
| Mintun et al., 1988 (17)    | 13       | First attempt at imaging breast masses with <sup>18</sup> F-FES PET                                                                                                                                     | <sup>18</sup> F-FES uptake seen at site of primary tumor, axillary nodal metastases, and one distant metastatic site; 0.96 correlation between <sup>18</sup> F-FES uptake and ER concentration measured by in vitro radioligand binding assay                                                                      |
| McGuire et al., 1991 (41)   | 16       | Evaluate potential of <sup>18</sup> F-FES PET for imaging metastatic breast cancer; assess changes in <sup>18</sup> F-FES uptake before and after initiation of endocrine therapy                       | Sensitivity 93% for <sup>18</sup> F-FES PET in detecting metastatic lesions; <sup>18</sup> F-FES uptake decreased in lesions after initiation of hormonal therapy, suggesting receptor-mediated uptake of <sup>18</sup> F-FES                                                                                      |
| Dehdashti et al., 1995 (21) | 53       | Compare <sup>18</sup> F-FES PET and <sup>18</sup> F-FDG PET to in vitro radioligand and immunohistochemical ER expression, compare <sup>18</sup> F-FDG PET with tumor ER status                         | 88% correlation between <sup>18</sup> F-FES uptake and in vitro ER expression; no correlation between <sup>18</sup> F-FDG uptake and ER status or <sup>18</sup> F-FDG and <sup>18</sup> F-FES uptake                                                                                                               |
| Mortimer et al., 1996 (33)  | 43       | Evaluate ability of <sup>18</sup> F-FDG PET and <sup>18</sup> F-FES PET to predict response to hormonal therapy; correlate <sup>18</sup> F-FES PET to in vitro ER assay                                 | Using threshold <sup>18</sup> F-FES SUV of 1.0, PPV 70%, NPV 66% for treatment response; sensitivity 76%, specificity 100% for in vitro ER status                                                                                                                                                                  |
| Dehdashti et al., 1999 (23) | 11       | Correlate pre- and posttamoxifen initiation <sup>18</sup> F-FDG PET and <sup>18</sup> F-FES PET imaging to treatment response                                                                           | <sup>18</sup> F-FDG PET demonstrated subclinical metabolic flare in treatment responders; responders had higher pretreatment <sup>18</sup> F-FES uptake and greater decrease in <sup>18</sup> F-FES uptake after treatment initiation                                                                              |
| Mortimer et al., 2001 (24)  | 40       | Determine ability of <sup>18</sup> F-FDG PET and <sup>18</sup> F-FES PET to detect metabolic flare and changes in tumor ER availability after initiation of tamoxifen                                   | <sup>18</sup> F-FDG PET demonstrated subclinical metabolic flare in treatment responders; responders had higher pretreatment <sup>18</sup> F-FES uptake and greater decrease in <sup>18</sup> F-FES uptake after treatment initiation                                                                              |
| Linden et al., 2006 (25)    | 47       | Determine ability of pretreatment <sup>18</sup> F-FES PET to predict response to salvage hormonal therapy in heavily pretreated metastatic breast cancer patients                                       | Significant association between quantitative <sup>18</sup> F-FES PET and treatment response; sensitivity of 100%, specificity of 42% with threshold SUV of 1.5                                                                                                                                                     |
| Peterson et al., 2008 (18)  | 17       | Compare <sup>18</sup> F-FES PET to qualitative and semiquantitative immunohistochemical assay ER expression                                                                                             | SUV threshold of 1.1 demonstrated 94% agreement with immunohistochemistry results                                                                                                                                                                                                                                  |
| Dehdashti et al., 2009 (26) | 51       | Determine if <sup>18</sup> F-FDG PET metabolic flare induced by estradiol challenge and baseline <sup>18</sup> F-FES PET correlate with treatment response to AI or fulvestrant                         | Responders had higher baseline <sup>18</sup> F-FES uptake; threshold <sup>18</sup> F-FES SUV of 2.0 had PPV 50% and NPV 81% for response; only responders demonstrated metabolic flare                                                                                                                             |
| Tonkin et al., 2010 (34)    | 38       | Assess utility of pretreatment <sup>18</sup> F-FES PET in predicting response to hormone therapy and correlate <sup>18</sup> F-FES PET with <sup>18</sup> F-FDG PET results in metastatic breast cancer | 53% of patients had lesions with discordant <sup>18</sup> F-FES and <sup>18</sup> F-FDG uptake; discordant lesions demonstrated only stable disease at best                                                                                                                                                        |
| Kurland et al., 2011 (35)   | 91       | Describe within-patient and between-patient heterogeneity of <sup>18</sup> F-FES PET uptake                                                                                                             | Within-patient <sup>18</sup> F-FES uptake and ratio of <sup>18</sup> F-FES to <sup>18</sup> F-FDG uptake clustered around patient's average value; wide variance of average <sup>18</sup> F-FES uptake between patients (intraclass correlation coefficient 0.6); 37% had low or absent <sup>18</sup> F-FES uptake |
| Linden et al., 2011 (37)    | 30       | Utilize <sup>18</sup> F-FES PET to evaluate in vivo pharmacodynamics of ER binding of various endocrine therapies                                                                                       | Treatment with tamoxifen or fulvestrant demonstrated greater degree of blockade than with AIs; rate of complete blockade greater with tamoxifen than with fulvestrant                                                                                                                                              |
| Peterson et al., 2011 (22)  | 239      | Assess factors that affect quantitative <sup>18</sup> F-FES uptake                                                                                                                                      | <sup>18</sup> F-FES uptake had inverse relationship with SHBG; no relationship with plasma estradiol, patient age, or rate of <sup>18</sup> F-FES metabolism; direct relationship with body mass index but not lean body mass                                                                                      |

|                                |    |                                                                                                                                                               |                                                                                                                                                                                                                                                                                   |
|--------------------------------|----|---------------------------------------------------------------------------------------------------------------------------------------------------------------|-----------------------------------------------------------------------------------------------------------------------------------------------------------------------------------------------------------------------------------------------------------------------------------|
| van Kruchten et al., 2012 (65) | 33 | Evaluate utility of <sup>18</sup> F-FES PET in ER-positive breast cancer patients presenting with a clinical dilemma                                          | <sup>18</sup> F-FES PET utilized to evaluate equivocal lesions on standard workup, ER status of patients with metastases, and origin of metastatic lesions. <sup>18</sup> F-FES PET improved diagnostic understanding in 88% of patients and resulted in change of therapy in 48% |
| Gemignani et al., 2013 (20)    | 48 | Compare <sup>18</sup> F-FES PET to in vitro ER expression in patients with operable primary breast cancer                                                     | Sensitivity 85%, specificity 75% with threshold <sup>18</sup> F-FES SUV of 1.5; <sup>18</sup> F-FES SUV did not correlate with ER and PR gene expression                                                                                                                          |
| Yang et al., 2013 (36)         | 32 | Assess heterogeneity of ER expression with <sup>18</sup> F-FES PET and <sup>18</sup> F-FDG PET                                                                | 33.4-fold difference in <sup>18</sup> F-FES uptake between patients, 8.2-fold difference in <sup>18</sup> F-FES uptake among lesions in the same patient; 28.1% of patients had discordant <sup>18</sup> F-FES and <sup>18</sup> F-FDG uptake                                     |
| Peterson et al., 2014 (16)     | 19 | Evaluate pretreatment <sup>18</sup> F-FES PET association with treatment response and ER expression in newly metastatic breast cancer                         | No patient with baseline <sup>18</sup> F-FES SUV < 1.5 had response; all patients with ER-negative biopsy had low average <sup>18</sup> F-FES uptake and at least one <sup>18</sup> F-FES-negative site                                                                           |
| Wang et al., 2015 (39)         | 30 | Utilized <sup>18</sup> F-FES PET to validate ER engagement by novel ER $\alpha$ antagonist and degrader                                                       | Posttherapy <sup>18</sup> F-FES PET demonstrated > 90 % reduction in <sup>18</sup> F-FES uptake in 90% of patients                                                                                                                                                                |
| van Kruchten et al., 2015 (28) | 19 | Evaluate <sup>18</sup> F-FES PET in predicting response to additive low-dose estradiol therapy in patients with endocrine-refractory metastatic breast cancer | <sup>18</sup> F-FES SUV threshold of 1.5 had PPV 60% and NPV 80% for response to treatment                                                                                                                                                                                        |
| van Kruchten et al., 2015 (38) | 16 | Assess change in <sup>18</sup> F-FES uptake during fulvestrant therapy in patients with ER-positive metastatic breast cancer                                  | 38% demonstrated incomplete reduction in ER availability (< 75% reduction in <sup>18</sup> F-FES uptake and residual SUV $\geq$ 1.5), which was associated with early progression                                                                                                 |

<sup>18</sup>F-FES = <sup>18</sup>F-fluoroestradiol. ER = estrogen receptor. PET = positron emission tomography. <sup>18</sup>F-FDG = <sup>18</sup>F-fluorodeoxyglucose. SUV = standardized uptake value. PPV = positive predictive value. NPV = negative predictive value. SHBG = sex hormone binding globulin.

**TABLE 2. Studies correlating <sup>18</sup>F-FES PET with in vitro assay**

|                             | <b>Patient Population</b>                                                                                          | <b>Key Outcomes</b>                                                                                                                                                                                                                                                                                       |
|-----------------------------|--------------------------------------------------------------------------------------------------------------------|-----------------------------------------------------------------------------------------------------------------------------------------------------------------------------------------------------------------------------------------------------------------------------------------------------------|
| Mintun et al., 1988 (17)    | 13 postmenopausal women with primary breast masses suspected to be primary breast cancers                          | High correlation ( $r = 0.96$ ) between tumor <sup>18</sup> F-FES uptake and ER concentration measured by in vitro radioligand binding; poor correlation with progesterin-receptor concentration                                                                                                          |
| Dehdashti et al., 1995 (21) | 32 patients with primary breast masses (Group 1), 21 patients with recurrent or metastatic breast cancer (Group 2) | SUV $\geq 1.0$ considered positive; 82% agreement between <sup>18</sup> F-FES PET and in vitro assay (combination of radioligand binding and immunohistochemistry) in Group 1; 94% agreement in Group 2; overall 88% agreement between <sup>18</sup> F-FES PET and in vitro assays                        |
| Mortimer et al., 1996 (33)  | 43 patients with locally advanced or metastatic breast cancer                                                      | SUV $\geq 1.0$ considered positive; sensitivity of 76% and specificity of 100% compared to in vitro assay (combination of radioligand binding and immunohistochemistry)                                                                                                                                   |
| Dehdashti et al., 1999 (23) | 11 patients with ER-positive breast cancer with newly diagnosed metastatic disease                                 | All 11 patients had SUV $> 1.0$                                                                                                                                                                                                                                                                           |
| Peterson et al., 2008 (18)  | 17 patients with newly diagnosed or recurrent breast cancer                                                        | SUV vs. qualitative immunohistochemistry had Spearman correlation coefficient ( $\rho$ ) of 0.62; SUV vs. semiquantitative Allred had $\rho = 0.72$ ; SUV vs. semiquantitative immunohistochemical index had $\rho = 0.73$ ; 94% agreement between SUV and immunohistochemistry with SUV threshold of 1.1 |
| Gemginani et al., 2013 (20) | 48 patients with primary breast cancer at least 1 cm in size without prior treatment                               | SUV $> 1.5$ considered positive; sensitivity of 85%, specificity of 75%, PPV 94%, NPV 50%, area under ROC curve of 0.85                                                                                                                                                                                   |

<sup>18</sup>F-FES = <sup>18</sup>F-fluoroestradiol. ER = estrogen receptor. SUV = standardized uptake value. PET = positron emission tomography. PPV = positive predictive value. NPV = negative predictive value. ROC = receiver operating characteristic.

**TABLE 3. Studies evaluating <sup>18</sup>F-FES PET as predictor of response to endocrine therapy**

|                                | Patient Population                                                                                                                                                  | Key Outcomes                                                                                                                                                                                        |
|--------------------------------|---------------------------------------------------------------------------------------------------------------------------------------------------------------------|-----------------------------------------------------------------------------------------------------------------------------------------------------------------------------------------------------|
| Mortimer et al., 1996 (33)     | 43 patients with locally advanced or metastatic breast cancer                                                                                                       | Baseline SUV $\geq 1.0$ considered positive; PPV 70%, NPV 66% for treatment response                                                                                                                |
| Dehdashti et al., 1999 (23)    | 11 patients with ER-positive breast cancer with newly diagnosed metastatic disease, for whom tamoxifen treatment was planned                                        | 7 responders, 4 nonresponders; responders trended toward higher baseline SUV ( $4.6 \pm 2.2$ vs. $2.5 \pm 1.9$ ; $P = 0.09$ ); all responders had baseline SUV $> 2.2$                              |
| Mortimer et al., 2001 (24)     | 40 endocrine therapy naïve postmenopausal women with ER-positive locally advanced, recurrent, or metastatic breast cancer, for whom tamoxifen treatment was planned | 21 responders, 19 nonresponders; responders had higher mean baseline SUV ( $4.3 \pm 2.4$ vs. $1.8 \pm 1.4$ ; $P = 0.0007$ )                                                                         |
| Linden et al., 2006 (25)       | 47 pretreated patients with an ER-positive primary tumor, presenting with recurrent or metastatic breast cancer                                                     | No patient with baseline SUV $< 1.5$ had objective response to salvage endocrine therapy                                                                                                            |
| Dehdashti et al., 2009 (26)    | 51 postmenopausal women with locally advanced or metastatic ER-positive breast cancer, for whom treatment with an AI or fulvestrant was planned                     | 17 responders, 34 nonresponders; responders had higher mean baseline SUV ( $3.5 \pm 2.5$ vs. $2.1 \pm 1.8$ ; $P = 0.0049$ ); with threshold SUV $\geq 2.0$ , PPV of 50% and NPV of 81% for response |
| Peterson et al., 2014 (16)     | 19 patients with newly diagnosed metastatic cancer with ER-positive primary tumor                                                                                   | 2 of 5 patients with baseline SUV $\leq 1.5$ were available for response assessment and both had progression of disease                                                                             |
| van Kruchten et al., 2015 (28) | 19 patients with ER-positive metastatic breast cancer that progressed after $\geq 2$ lines of endocrine therapy, with previous response to endocrine therapy        | Median SUV <sub>max</sub> $> 1.5$ considered positive; PPV 60% and NPV 80% for treatment response                                                                                                   |
| van Kruchten et al., 2015 (38) | 16 postmenopausal women with ER-positive metastatic breast cancer with progression of disease after $\geq 2$ lines of endocrine therapy                             | No significant difference in baseline median SUV <sub>max</sub> between responders and nonresponders ( $3.1$ vs. $2.5$ ; $P = 0.6$ )                                                                |

SUV = standardized uptake value. PPV = positive predictive value. NPV = negative predictive value. ER = estrogen receptor. AI = aromatase inhibitor.

**TABLE 4. Studies utilizing <sup>18</sup>F-FES PET to demonstrate heterogeneity of disease**

|                                | <b>Patient Population</b>                                                                                                                                        | <b>Key Outcomes</b>                                                                                                                                                                                                                                                                   |
|--------------------------------|------------------------------------------------------------------------------------------------------------------------------------------------------------------|---------------------------------------------------------------------------------------------------------------------------------------------------------------------------------------------------------------------------------------------------------------------------------------|
| Dehdashti et al., 1995 (21)    | 53 patients total, 21 of whom had recurrent or metastatic breast cancer, 13 of whom had multiple sites evaluated on <sup>18</sup> F-FES PET                      | 2 of 13 patients (15%) had discordant <sup>18</sup> F-FES uptake in at least one site                                                                                                                                                                                                 |
| Mortimer et al., 1996 (33)     | 43 patients with locally advanced or metastatic breast cancer; 17 of whom had multiple sites evaluated on <sup>18</sup> F-FES PET                                | 4 of 17 patients (24%) had discordant <sup>18</sup> F-FES uptake in one site                                                                                                                                                                                                          |
| Linden et al., 2006 (25)       | 47 pretreated patients with an ER-positive primary tumor, presenting with recurrent or metastatic breast cancer                                                  | 6 of 47 (13%) patients had at least one qualitatively <sup>18</sup> F-FES-negative site                                                                                                                                                                                               |
| Dehdashti et al., 2009 (26)    | 51 postmenopausal women with locally advanced or metastatic ER-positive breast cancer, for whom treatment with an AI or fulvestrant was planned                  | 16 of 51 (31%) patients had mean SUV $\leq$ 1.0                                                                                                                                                                                                                                       |
| Tonkin et al., 2010 (34)       | 38 patients with ER-positive metastatic breast cancer undergoing 1st-, 2nd-, or 3rd-line hormone therapy                                                         | 20 of 38 (53%) had discordant <sup>18</sup> F-FES uptake in at least one site ( <sup>18</sup> F-FES-negative, <sup>18</sup> F-FDG-positive)                                                                                                                                           |
| Kurland et al., 2011 (35)      | 91 patients with prior ER-positive biopsy scheduled to initiate, resume, or change endocrine therapy                                                             | SUV for individual lesions ranged from 0.0 to 10.2; average SUV ranged from 0.2 to 6.7 between patients, intraclass correlation coefficient was 0.60; 34 of 91 (37%) patients had mean SUV < 1.0; small number of patients with discordant <sup>18</sup> F-FES uptake                 |
| van Kruchten et al., 2012 (65) | 33 patients with history of ER-positive breast cancer presenting with equivocal lesions on conventional workup, metastatic disease, or lesions of unknown origin | Wide variance in SUV seen in metastatic lesions (range, 1.2–18.81); 45% of patients had both <sup>18</sup> F-FES-positive and <sup>18</sup> F-FES-negative lesions                                                                                                                    |
| Yang et al., 2013 (36)         | 32 patients with new, recurrent, or metastatic breast cancer                                                                                                     | SUV <sub>max</sub> ranged from 0.5 to 16.7 between patients (33.4-fold difference); SUV <sub>max</sub> ranged from 1.0 to 8.2 (8.2-fold difference) within a single individual; 9 of 32 (28%) patients had both <sup>18</sup> F-FES-positive and <sup>18</sup> F-FES-negative lesions |
| Peterson et al., 2014 (16)     | 19 patients with newly diagnosed metastatic cancer with ER-positive primary tumor                                                                                | 5 of 19 (26%) patients had average SUV $\leq$ 1.5; 6 of 19 (32%) had at least one qualitatively <sup>18</sup> F-FES-negative site                                                                                                                                                     |
| van Kruchten et al., 2015 (28) | 19 patients with ER-positive metastatic breast cancer that progressed after $\geq$ 2 lines of endocrine therapy                                                  | 6 of 19 (32%) patients had both <sup>18</sup> F-FES-positive and <sup>18</sup> F-FES-negative lesions; wide variance of SUV <sub>max</sub> between lesions (range, 0.6–24.3) and patients (1.1–15.5)                                                                                  |
| van Kruchten et al., 2015 (38) | 16 postmenopausal women with ER-positive metastatic breast cancer with progression of disease after $\geq$ 2 lines of endocrine therapy                          | 5 of 16 (31%) patients had at least one <sup>18</sup> F-FES-negative metastatic lesion                                                                                                                                                                                                |

<sup>18</sup>F-FES = <sup>18</sup>F-fluoroestradiol. PET = positron emission tomography. ER = estrogen receptor. AI = aromatase inhibitor. SUV = standardized uptake value. <sup>18</sup>F-FDG = <sup>18</sup>F-fluorodeoxyglucose.



**TABLE 5. Studies evaluating impact of endocrine therapy on <sup>18</sup>F-FES uptake**

|                                | <b>Patient Population</b>                                                                                                                                           | <b>Key Outcomes</b>                                                                                                                                                                                                                                                                                                                                                                                             |
|--------------------------------|---------------------------------------------------------------------------------------------------------------------------------------------------------------------|-----------------------------------------------------------------------------------------------------------------------------------------------------------------------------------------------------------------------------------------------------------------------------------------------------------------------------------------------------------------------------------------------------------------|
| McGuire et al., 1991 (41)      | 16 patients with recurrent or metastatic breast cancer; 7 of whom had evaluable <sup>18</sup> F-FES PET imaging before and after initiation of endocrine therapy    | Mean lesion SUV decreased from 2.2 ( $\pm$ 1.23) to 0.80 ( $\pm$ 0.42) after initiation of endocrine therapy                                                                                                                                                                                                                                                                                                    |
| Dehdashti et al., 1999 (23)    | 11 patients with ER-positive breast cancer with newly diagnosed metastatic disease, for whom tamoxifen treatment was planned                                        | 7 responders, 4 nonresponders; responders had greater posttreatment mean decrease in SUV ( $2.7 \pm 1.7$ vs. $0.8 \pm 0.5$ ; $P = 0.04$ )                                                                                                                                                                                                                                                                       |
| Mortimer et al., 2001 (24)     | 40 endocrine therapy-naïve postmenopausal women with ER-positive locally advanced, recurrent, or metastatic breast cancer, for whom tamoxifen treatment was planned | 21 responders, 19 nonresponders; responders had higher percentage decrease in SUV from baseline ( $-54.8\% \pm 14.2\%$ vs. $-19.4\% \pm 17.3\%$ ; $P = 0.0003$ ) and larger mean change in SUV ( $-2.5 \pm 1.8$ vs. $-0.5 \pm 0.6$ ; $P = 0.0003$ )                                                                                                                                                             |
| Linden et al., 2011 (37)       | 30 patients with metastatic breast cancer who had serial <sup>18</sup> F-FES PET imaging while undergoing endocrine therapy                                         | Patients on ER blockers (tamoxifen and fulvestrant) had lower average SUV during treatment vs. patients on nonblockers (AIs) ( $1.5$ vs. $2.2$ ; $P = 0.04$ ); patients on blockers had higher average percentage decline in SUV ( $54\%$ vs. $14\%$ ; $P < 0.001$ ); 100% of patients treated with tamoxifen vs. 36% of patients treated with fulvestrant demonstrated complete ER blockade ( $SUV \leq 1.5$ ) |
| Wang et al., 2015 (39)         | 30 patients with advanced or metastatic ER-positive breast cancer treated with ARN-810 (novel ER $\alpha$ antagonist and degrader)                                  | 27 of 30 (90%) patients demonstrated > 90% decrease of $SUV_{max}$ on posttherapy scan                                                                                                                                                                                                                                                                                                                          |
| van Kruchten et al., 2015 (38) | 16 postmenopausal women with ER-positive metastatic breast cancer with progression of disease after $\geq 2$ lines of endocrine therapy                             | Patients with clinical benefit from fulvestrant (no radiologic or clinical progression of disease for at least 24 weeks) had greater median change in SUV ( $-88\%$ vs. $-58\%$ ; $P = 0.025$ ); patients with incomplete ER blockade ( $<75\%$ decrease in <sup>18</sup> F-FES uptake and residual $SUV \geq 1.5$ ) had shorter median progression free survival (3.3 months vs. 11.7 months; $P < 0.05$ )     |

<sup>18</sup>F-FES = <sup>18</sup>F-fluoroestradiol. PET = positron emission tomography. SUV = standardized uptake value. ER = estrogen receptor. AI = aromatase inhibitor.
